# Supplementary material for: Effect of music listening on hypertonia in neurologically impaired patients—systematic review
Source: PeerJ. 2019 Dec 19;7:e8228. doi: 10.7717/peerj.8228 (PMC6925946; doi:10.7717/peerj.8228)
Supplement: Supplemental Information 3 [file peerj-07-8228-s003.xlsx]

## Sheet: Jeba et al. 
Muscle Performance		exp			con
		pre	post	Change	pre	post	Change
	SA	14.5	13	-1.5	14.5	11	-3.5
	EF	16	11.5	-4.5	13	9	-4
	FP	16.5	10.5	-6	15.5	10.5	-5
	HA	12	8.5	-3.5	13.5	9.5	-4
	KE	11.5	7	-4.5	11.5	5	-6.5
	AP	29	22	-7	29	26.5	-2.5
				-4.5			-4.25
				1.92354			1.36931

## Sheet: Pazi et al,
Group	Pre	Post	Change
1	2.98	2.3	-0.68
1	2.58	1.13	-1.45
1	4.5	2.55	-1.95
1	3.48	2.81	-0.67
1	1.71	0	-1.71
1	4.99	1.15	-3.84		Muscle Performance
1	4.59	2.85	-1.74		change	sd
1	4.04	3.56	-0.48
1	3.54	2.4	-1.14	Music	-1.51778	1.01924
0	3.22	3.02	-0.2	Control	-0.0233333	0.295804
0	1.48	1.65	0.17
0	3.13	2.88	-0.25
0	3.66	3.29	-0.37
0	3.6	3.69	0.09
0	2.8	2.57	-0.23
0	5.5	6.08	0.58
0	2.72	2.86	0.14
0	3.19	3.05	-0.14

## Sheet: Puggina et al.
Change score	Control			Music
Relaxation	7	70	0.1	4	25	0.16
NA	1	10	0.1	0	0	0
Tension	12	75	0.16	12	75	0.16
	Control			Music
Relaxation	8	80	0.1	9	64.3	0.139969
NA	0	0	0	0	0	0
Tension	2	20	0.1	5	35.7	0.140056
	Control			Music
Relaxation	12	60	0.2	11	36.7	0.299728
NA	1	5	0	1	3.3	0
Tension	7	35	0.2	18	60	0.3
Relaxation		0.133333	0.057735		0.199899	0.0870324
NA		0.0333333	0.057735		0	0
Tension		0.153333	0.0503322		0.200019	0.0871587
Muscle performace		0.106667	0.00427401		0.133306	0.0502847

## Sheet: Scartelli et al.
Group (Exp=1; Con=0)	Pre	Post	Change
1	48	30	-18
0	28	12	-16
1	20	2	-18
1	15	10	-5
0	7	3	-4
0	8	9	1
Muscle Performance		Music	-13.6667	Control	-5.75
			7.50555		8.73689

## Sheet: Wong et al. 
Group	Change	Muscle Performance
1	0.5
1	0.6
1	0.45
1	0.5	0.5125	0.0629153
0	0.17	0.37	0.175689
0	0.58
0	0.3
0	0.43
